# Supplementary material for: Retusone A, a Guaiane-Type Sesquiterpene Dimer from Wikstroemia retusa and Its Inhibitory Effects on Histone Acetyltransferase HBO1 Expression
Source: MDPI journal article supplement (doi:10.3390/molecules27092909), 2022-05-03
Supplement: s1 [file s1]

# Retusone A, A Guaiane-Type Sesquiterpene Dimer from *Wikstroemia retusa* and Its Inhibitory Effects on Histone Acetyltransferase HBO1 Expression

Young Sook Yun <sup>1,\*</sup>, Tomomi Nakano <sup>1</sup>, Haruhiko Fukaya <sup>1</sup>, Yukio Hitotsuyanagi <sup>1</sup>, Miho Nakamura <sup>1</sup>, Megumi Umetsu <sup>1</sup>, Nobuko Matsushita <sup>1,†</sup>, Katsunori Miyake <sup>1</sup>, Hiroyuki Fuchino <sup>2</sup>, Nobuo Kawahara <sup>2,‡</sup>, Fuki Moriya <sup>1</sup>, Akihiro Ito <sup>1</sup>, Yuji Takahashi <sup>1</sup> and Hideshi Inoue <sup>1</sup>

<sup>1</sup> School of Life Sciences, Tokyo University of Pharmacy and Life Sciences, 1432-1 Horinouchi, Tokyo 192-0392, Japan

<sup>2</sup> Research Center for Medicinal Plant Resources, National Institutes of Biomedical Innovation, Health and Nutrition, Tsukuba 305-0843, Japan

\* Correspondence: yun@toyaku.ac.jp; Tel.: +81-42-676-5319

† Present Address: School of Life and Environmental Science, Azabu University, 1-17-71 Fuchinobe, Chuo-ku, Sagamihara-shi 252-5201, Japan; matsushita@azabu-u.ac.jp

‡ Present Address: The Kochi Prefectural Makino Botanical Garden, 4200-6, Godaisan, Kochi City 781-8125, Japan; kawahara@makino.or.jp

|                                                                                                                        |     |
|------------------------------------------------------------------------------------------------------------------------|-----|
| Table S1. Crystal diffraction of <b>1</b> -----                                                                        | S2  |
| Table S2. Energy analysis for 2 <i>S</i> ,7 <i>R</i> ,14 <i>S</i> ,7' <i>R</i> ,14' <i>S</i> - <b>1</b> -----          | S3  |
| Figure S1. Lowest energy conformer for 2 <i>S</i> ,7 <i>R</i> ,14 <i>S</i> ,7' <i>R</i> ,14' <i>S</i> - <b>1</b> ----- | S3  |
| Figure S2. UV spectrum of <b>1</b> -----                                                                               | S4  |
| Figure S3. IR spectrum of <b>1</b> -----                                                                               | S4  |
| Figure S4. <sup>1</sup> H-NMR spectrum (500 MHz, CDCl <sub>3</sub> ) of <b>1</b> -----                                 | S5  |
| Figure S5. <sup>13</sup> C-NMR spectrum (125 MHz, CDCl <sub>3</sub> ) of <b>1</b> -----                                | S6  |
| Figure S6. <sup>1</sup> H- <sup>1</sup> H COSY spectrum of <b>1</b> -----                                              | S7  |
| Figure S7. HMQC spectrum of <b>1</b> -----                                                                             | S7  |
| Figure S8. HMBC spectrum of <b>1</b> -----                                                                             | S8  |
| Figure S9. MS chart of <b>1</b> -----                                                                                  | S8  |
| Figure S10. <sup>1</sup> H-NMR spectrum (500 MHz, CDCl <sub>3</sub> ) of <b>2</b> -----                                | S9  |
| Figure S11. <sup>13</sup> C-NMR spectrum (125 MHz, CDCl <sub>3</sub> ) of <b>2</b> -----                               | S9  |
| Figure S12. MS chart of <b>2</b> -----                                                                                 | S10 |

Table S1. Crystallographic data for **1**.

| Formula                      | C <sub>31</sub> H <sub>38</sub> O <sub>4</sub> |
|------------------------------|------------------------------------------------|
| $D_{calc.}/\text{g cm}^{-3}$ | 1.215                                          |
| $\mu/\text{mm}^{-1}$         | 0.079                                          |
| Formula Weight               | 474.61                                         |
| Colour                       | colourless                                     |
| Shape                        | plate                                          |
| Size/mm <sup>3</sup>         | 0.53×0.14×0.09                                 |
| $T/\text{K}$                 | 90                                             |
| Crystal System               | monoclinic                                     |
| Flack Parameter              | -1.0(6)                                        |
| Hooft Parameter              | -0.9(6)                                        |
| Space Group                  |                                                |
| $a/\text{\AA}$               | 22.460(6)                                      |
| $b/\text{\AA}$               | 5.0621(13)                                     |
| $c/\text{\AA}$               | 24.319(6)                                      |
| $\alpha^\circ$               | 90                                             |
| $\beta^\circ$                | 110.160(3)                                     |
| $\gamma^\circ$               | 90                                             |
| $V/\text{\AA}^3$             | 2595.5(11)                                     |
| $Z$                          | 4                                              |
| $Z'$                         | 1                                              |
| Wavelength/ $\text{\AA}$     | 0.71073                                        |
| Radiation type               | MoK $\alpha$                                   |
| $\theta_{min}/^\circ$        | 1.784                                          |
| $\theta_{max}/^\circ$        | 27.555                                         |
| Measured Refl's.             | 36724                                          |
| Indep't Refl's               | 5968                                           |
| Refl's $I \geq 2 \sigma(I)$  | 4867                                           |
| $R_{int}$                    | 0.0777                                         |
| Parameters                   | 321                                            |
| Restraints                   | 1                                              |
| Largest Peak                 | 0.342                                          |
| Deepest Hole                 | -0.236                                         |
| GooF                         | 1.036                                          |
| $wR_2$ (all data)            | 0.1265                                         |
| $wR_2$                       | 0.1173                                         |
| $R_1$ (all data)             | 0.0723                                         |
| $R_1$                        | 0.0530                                         |

Single colourless plate crystals of **1** slow crystallization from a methanol solution at room temperature. A suitable crystal with dimensions  $0.53 \times 0.14 \times 0.09 \text{ mm}^3$  was selected and the crystal was mounted on a MicroMount using perfluoropolyether oil on a Bruker SMART APEX II ULTRA diffractometer. The crystal was kept at a steady  $T = 90 \text{ K}$  during data collection. The structure was solved with the ShelXT 2014/5 solution program<sup>1</sup> using dual methods and by using Olex2 as the graphical interface. The model was refined with XL using full matrix least squares minimisation on  $F^2$ .

Table S2. Calculated Relative Energies (kcal/mol) and Populations (%) of the Three Lowest Energy Conformers of **1**.

| Conformer | $\Delta G$        | $P(\%)^b$ |
|-----------|-------------------|-----------|
| <b>a</b>  | 0.00 <sup>a</sup> | 48.8      |
| <b>b</b>  | 0.49              | 21.2      |
| <b>c</b>  | 0.79              | 12.9      |
| <b>d</b>  | 0.88              | 11.0      |
| <b>e</b>  | 1.23              | 6.1       |

<sup>a</sup> Calculated relative energies to **a** with  $\Delta G = -944642.89839$  kcal/mol at the B3LYP/6-311+G (2df, 2p) level in MeOH.

<sup>b</sup> Boltzmann population at  $T = 298$  K and 1 atm.

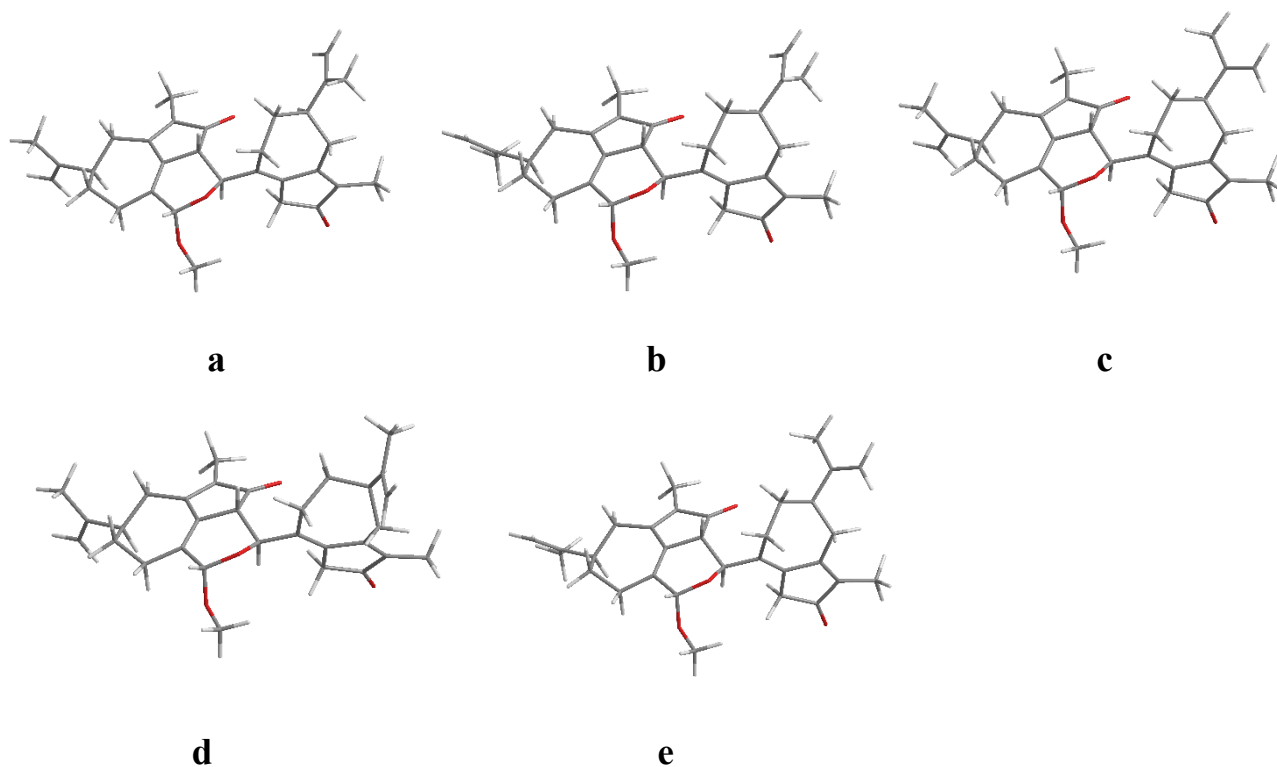

Figure S1. B3LYP/6-311+ G (2df,2p) optimized lowest energy conformers for **1**.

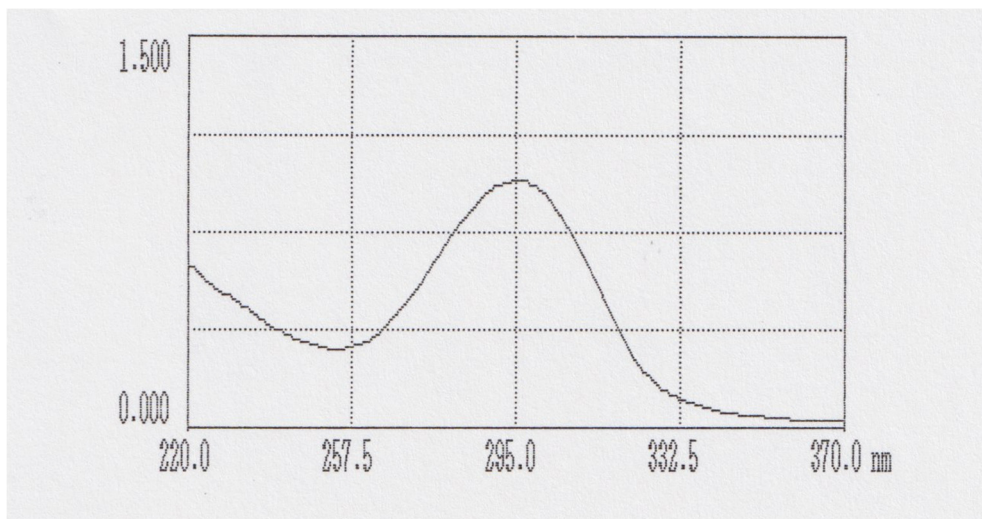

Figure S2. UV spectrum of **1**.

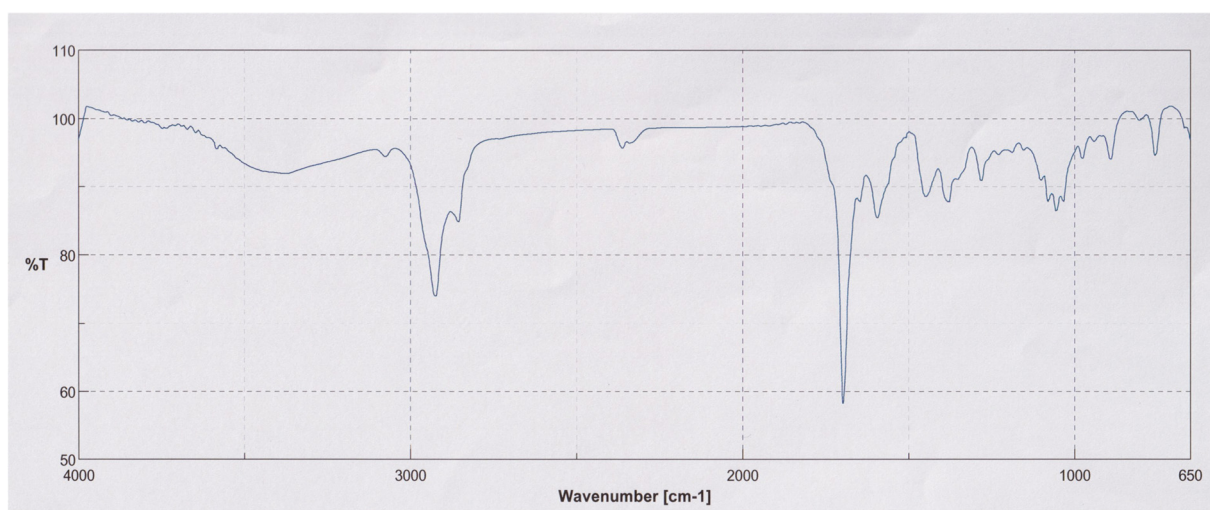

Figure S3. IR spectrum of **1**.

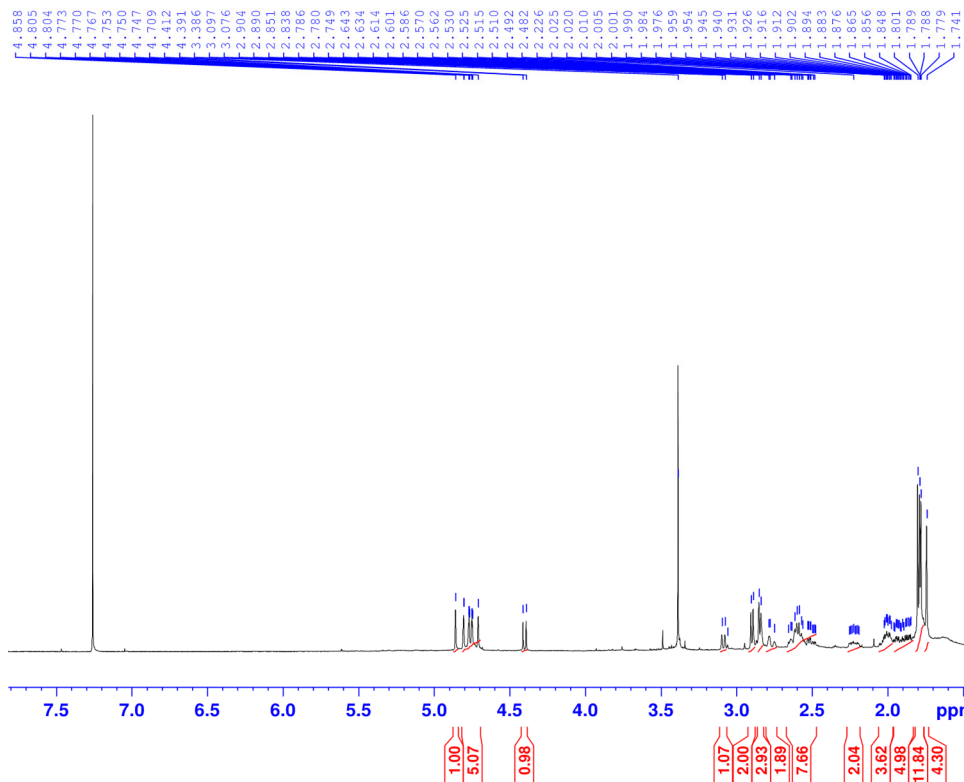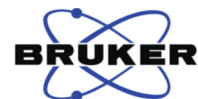

Current Data Parameters  
NAME Nov12-2020-Bunshi  
EXPNO 20  
PROCNO 1

F2 - Acquisition Parameters  
Date\_ 20201112  
Time 17.15  
INSTRUM spect  
PROBHD 5 mm PABBO BB/  
PULPROG zg30  
TD 65536  
SOLVENT CDCl3  
NS 8  
DS 4  
SWH 10000.000 Hz  
FIDRES 0.152588 Hz  
AQ 3.2767999 sec  
RG 190.86  
DW 50.000 usec  
DE 6.50 usec  
TE 300.0 K  
D1 1.00000000 sec  
TD0 1

===== CHANNEL f1 =====  
SFO1 500.2330891 MHz  
NUC1 1H  
P1 11.00 usec  
PLW1 27.00000000 W

F2 - Processing parameters  
SI 65536  
SF 500.2300126 MHz  
WDW EM  
SSB 0  
LB 0.30 Hz  
GB 0  
PC 1.00

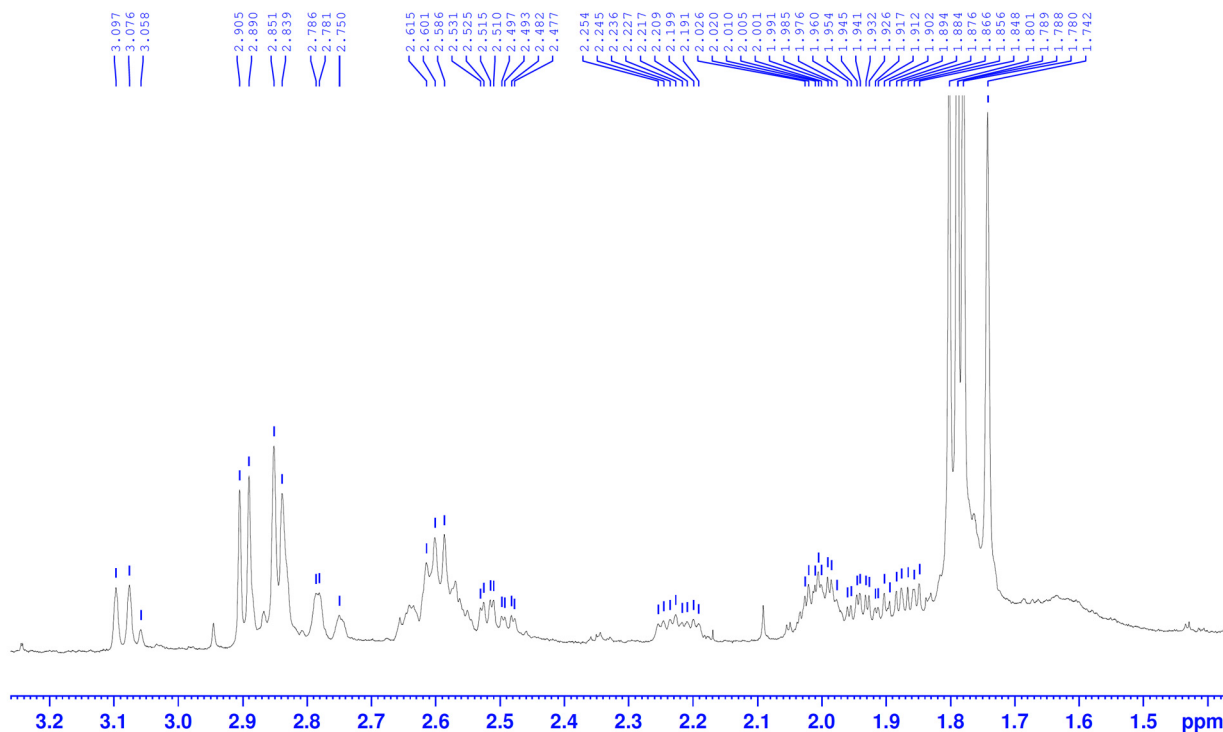

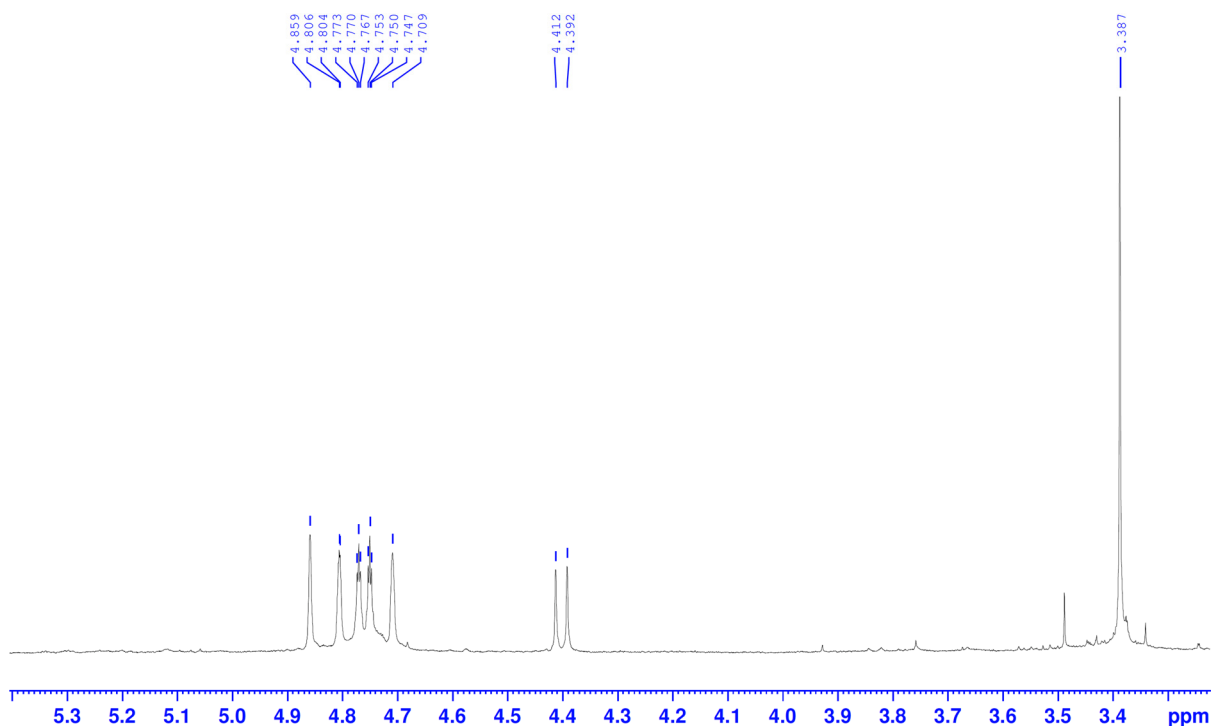

Figure S4.  $^1\text{H}$  NMR spectrum (500 MHz,  $\text{CDCl}_3$ ) of **1**.

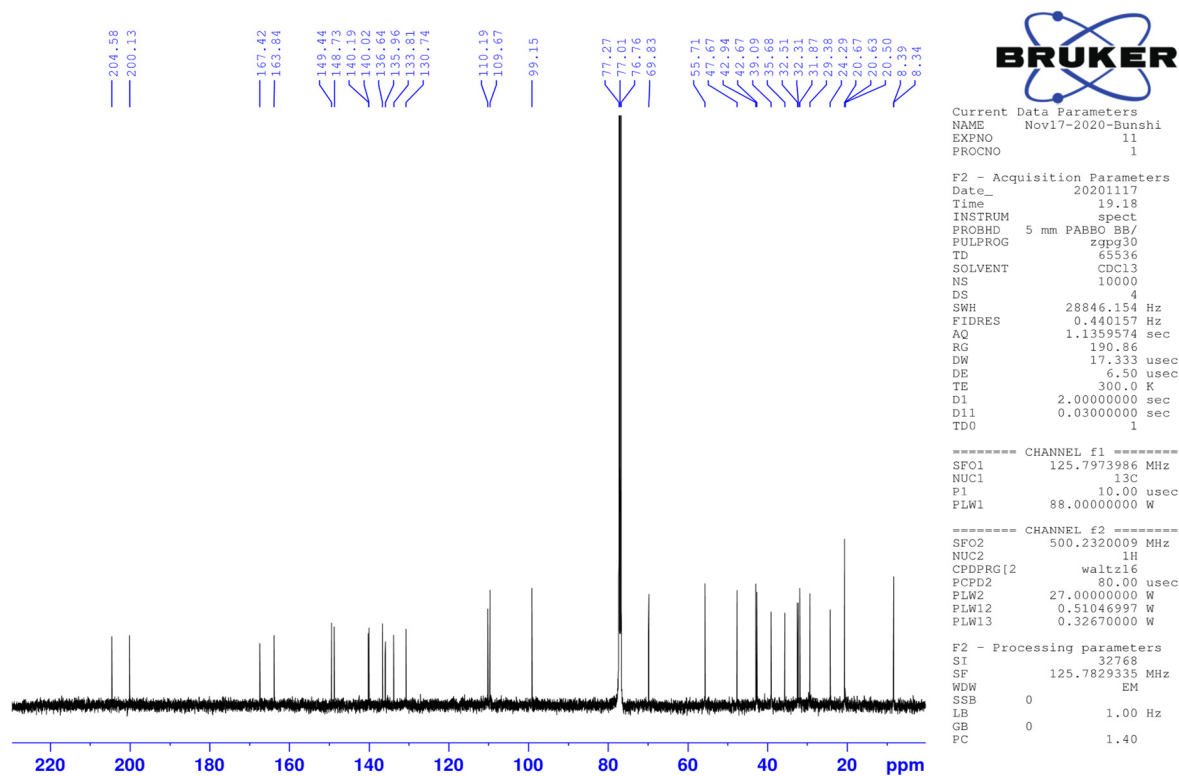

Figure S5.  $^{13}\text{C}$  NMR spectrum (125 MHz,  $\text{CDCl}_3$ ) of **1**.

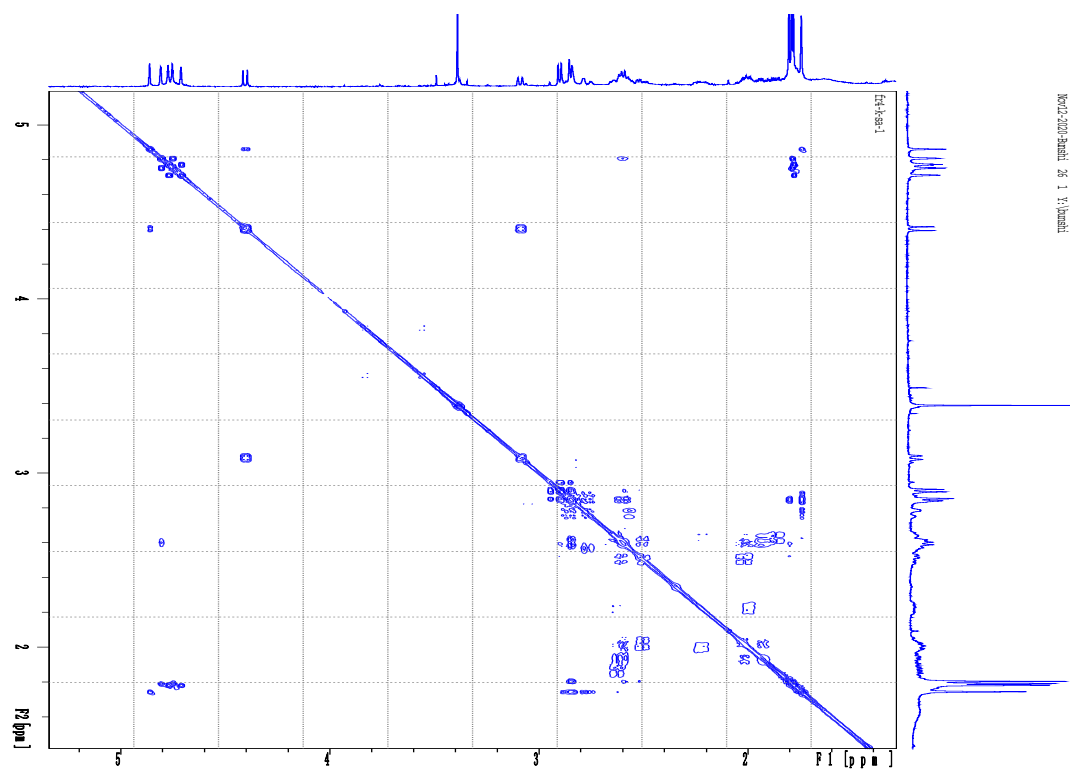

Figure S6.  $^1\text{H}$ - $^1\text{H}$  COSY spectrum of **1**.

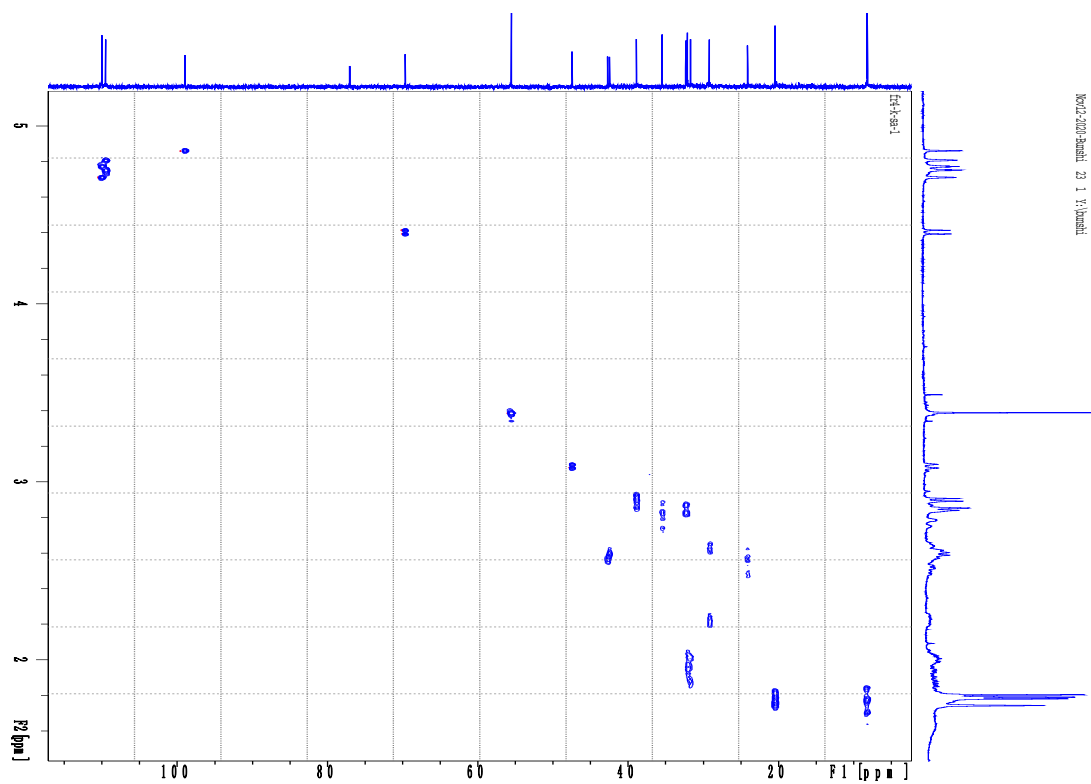

Figure S7. HMQC spectrum of **1**.

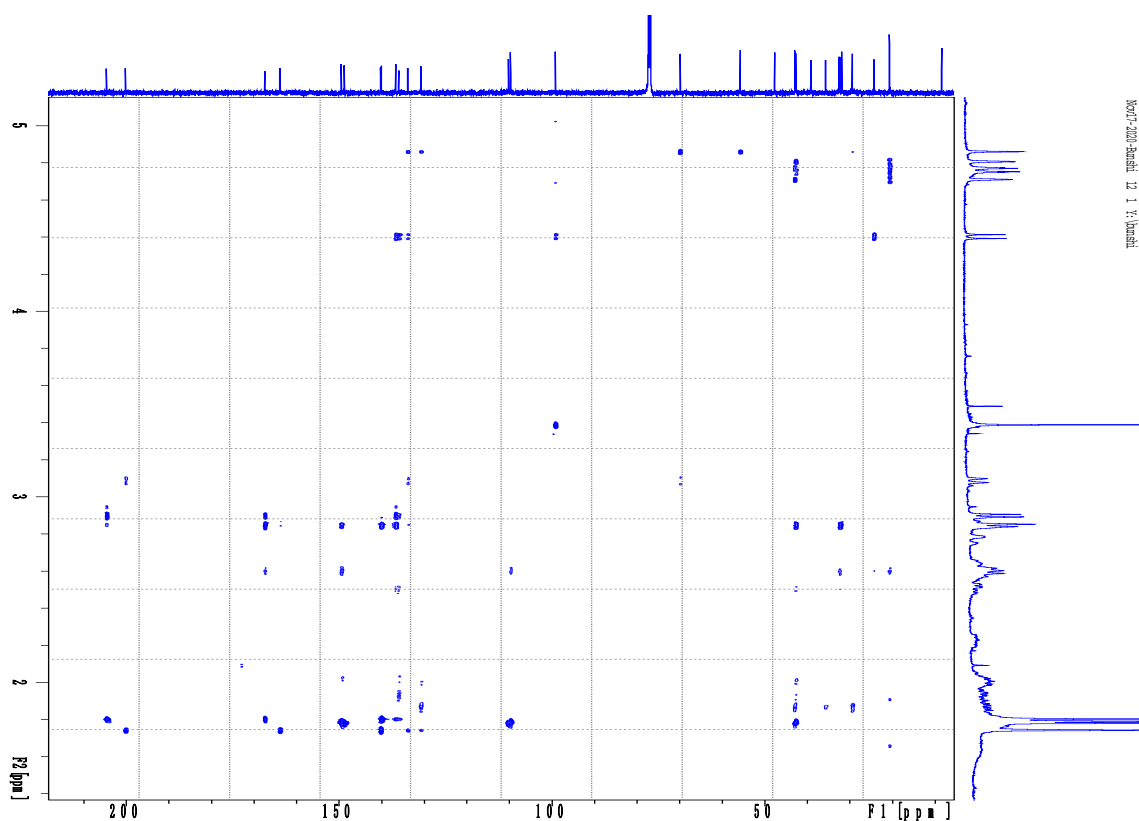

Figure S8. HMBC spectrum of **1**.

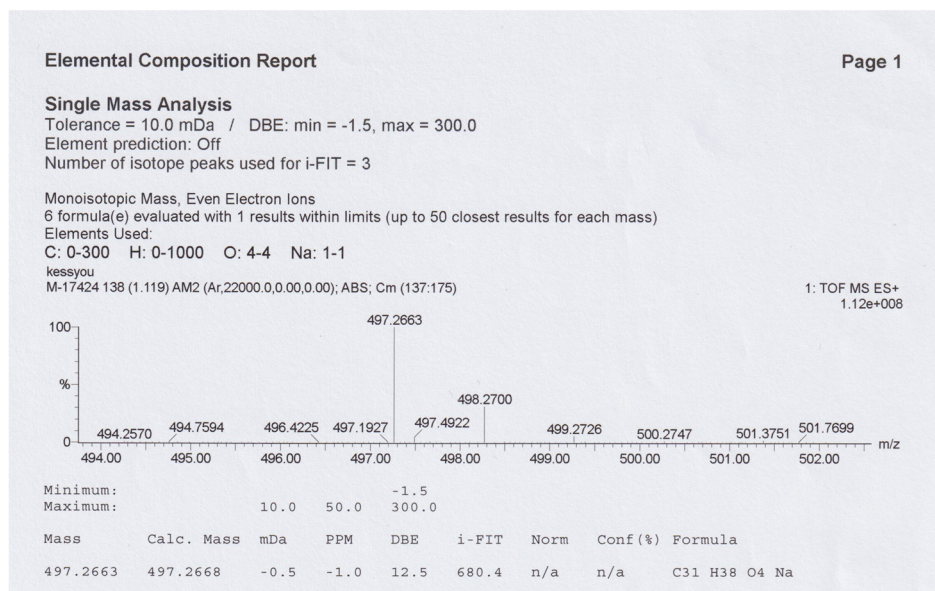

Figure S9. HR-ESI-MS chart of **1**.



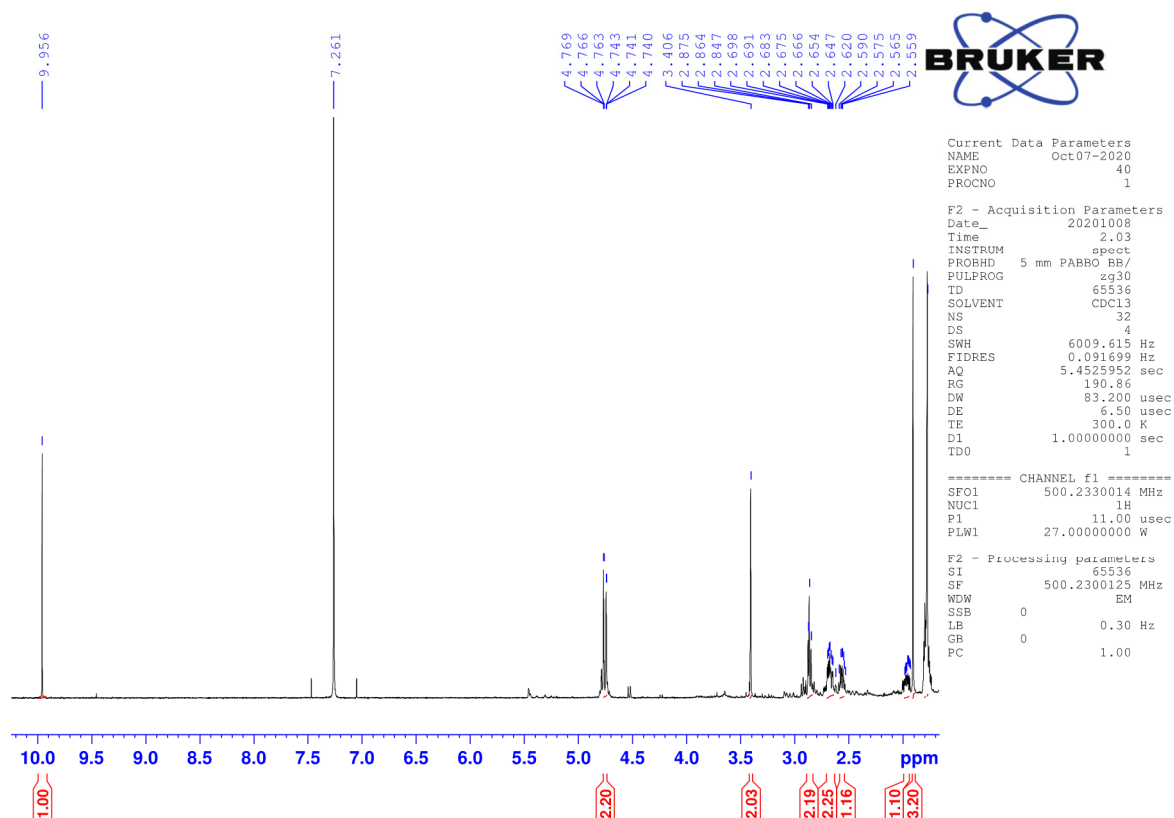

Figure S10.  $^1\text{H}$  NMR spectrum (500 MHz,  $\text{CDCl}_3$ ) of **2**.

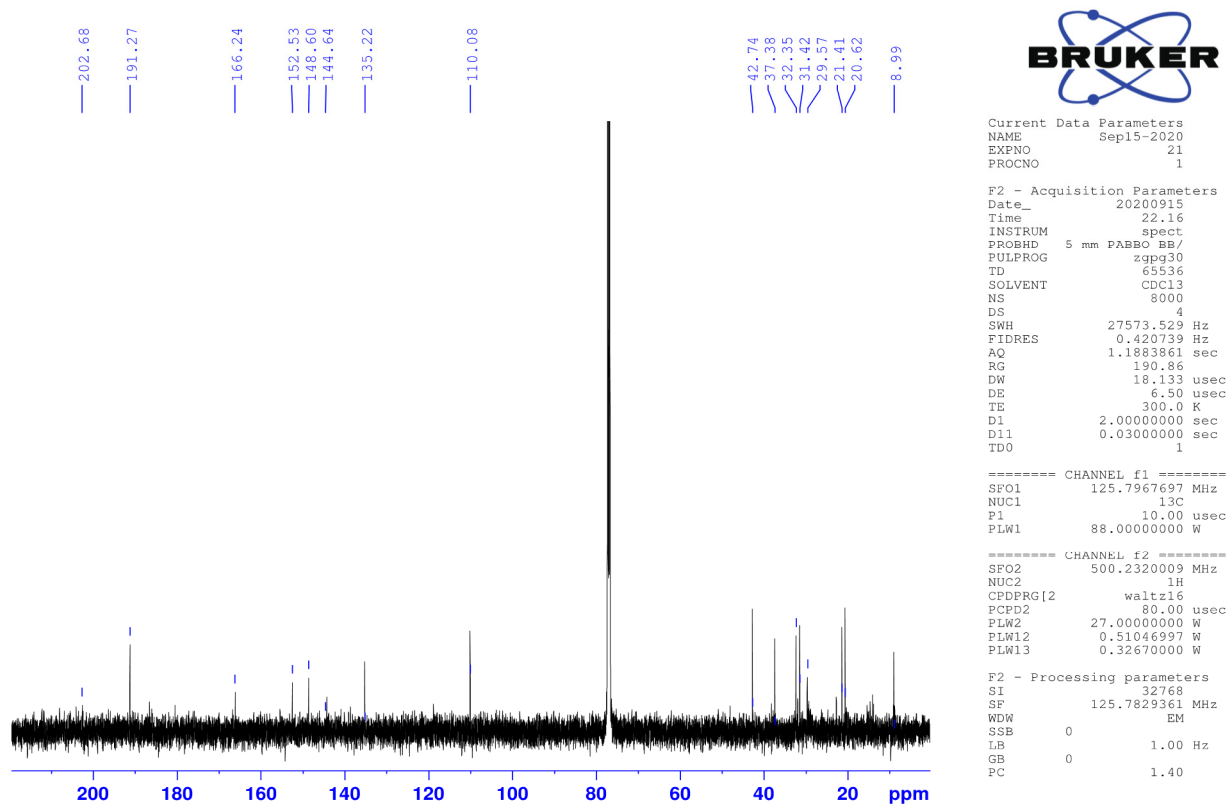

Figure S11.  $^{13}\text{C}$  NMR spectrum (125 MHz,  $\text{CDCl}_3$ ) of **2**.

## Single Mass Analysis

Tolerance = 10.0 mDa / DBE: min = -1.5, max = 300.0

Element prediction: Off

Number of isotope peaks used for i-FIT = 3

Monoisotopic Mass, Even Electron Ions

3 formula(e) evaluated with 1 results within limits (up to 50 closest results for each mass)

Elements Used:

C: 1-300 H: 1-1000 O: 2-2 Na: 1-1

fr3-3-2-1

M-17259 265 (2.133) AM2 (Ar,22000.0,0.00,0.00); ABS; Cm (230:267)

1: TOF MS ES+  
5.63e+007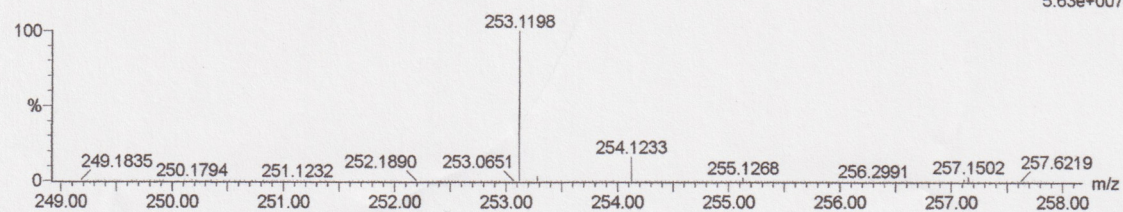

Minimum: -1.5  
Maximum: 10.0 50.0 300.0

| Mass     | Calc. Mass | mDa  | PPM  | DBE | i-FIT  | Norm | Conf (%) | Formula       |
|----------|------------|------|------|-----|--------|------|----------|---------------|
| 253.1198 | 253.1204   | -0.6 | -2.4 | 6.5 | 1001.6 | n/a  | n/a      | C15 H18 O2 Na |

Figure S12. HR-ESI-MS chart of 2.
